# Supplementary material for: Integrated SARS-CoV-2 serological and virological screening across an acute fever surveillance platform to monitor temporal changes in anti-spike antibody levels and risk of infection during sequential waves of variant transmission — Dominican Republic, March 2021 to August 2022
Source: bioRxiv or medRxiv preprint supplement (doi:10.1101/2022.10.24.22281399), 2022-11-07
Supplement: Supplementary file [file media-4.pdf]

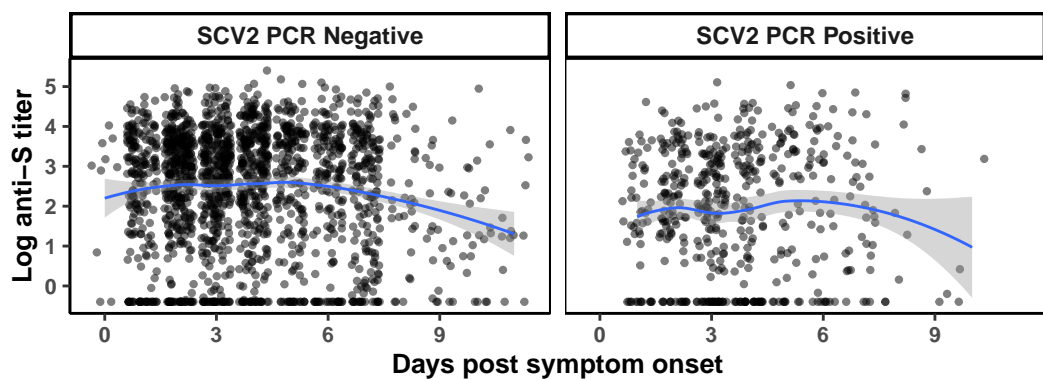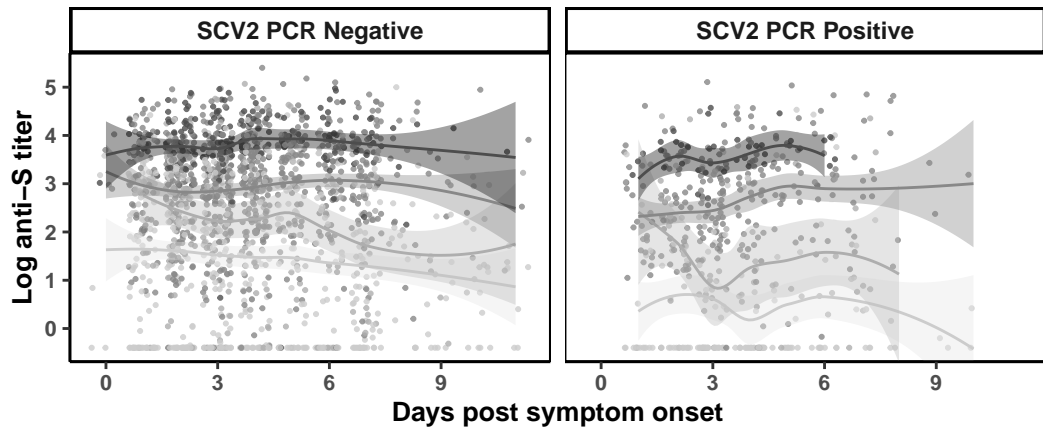

Vaccine doses

None One Two Three
